# Supplementary material
Source: Springer Nature journal article supplement (https://www.springermedizin.de/resource/supplementary/13058_2005_1340_MOESM1_ESM.pdf/9698894)
Supplement: MOESM1 [file 9698894]

— ANTIGEN UPTAKE —

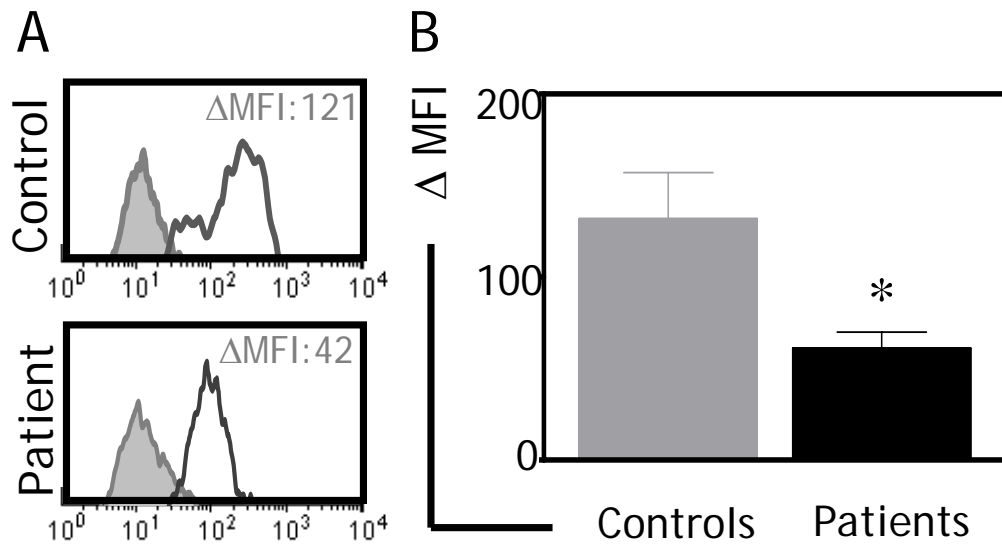

— PROLIFERATION —

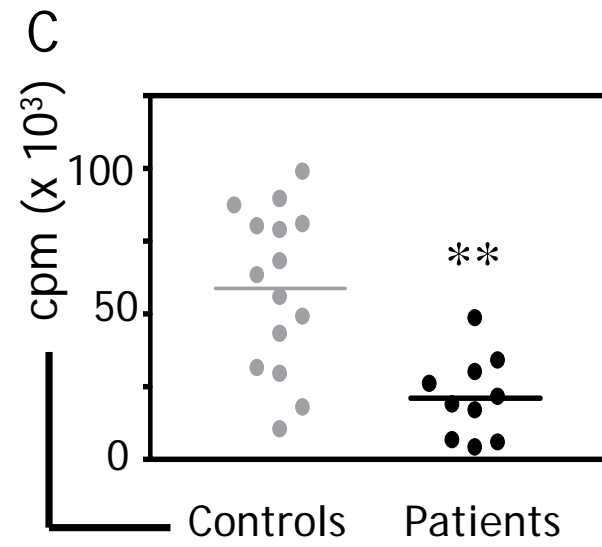

**Impaired uptake and allo-stimulatory capacity of blood DC  
from patients with breast cancer**

**(A)** To estimate antigen uptake, PBMC isolated from patients with breast cancer (Stage I-II;  $n=13$ ) or healthy volunteers ( $n=15$ ) were incubated with soluble FITC-conjugated tetanus toxoid (0.5 mg/mL) at either 4°C or 37°C. Cells were extensively washed and uptake by blood DC (Lin<sup>-</sup> HLA-DR<sup>+</sup> cells) estimated by flow cytometry as the difference in mean fluorescence intensity ( $\Delta$ MFI) between the test (37°C, empty histograms) and the negative control (4°C, filled histograms). In all experiments, each patient was tested in parallel with at least one healthy volunteer. Representative histograms are shown. **(B)** Summary of antigen uptake data. The average antigen uptake ( $\Delta$ MFI  $\pm$  standard error of the mean, SEM) by blood DC from all patients and healthy volunteers is shown accordingly. **(C)** To estimate allo-stimulatory capacity, blood DC purified (99% purity; MoFlo Sorter) from breast cancer patients (Stage I-II;  $n=10$ ) or age-matched healthy volunteers ( $n=15$ ) were individually tested against allogeneic T-cells obtained from a panel of healthy volunteers ( $n=3$ ). The pairs giving maximal responses are shown as means of triplicate measurements of <sup>3</sup>H-thymidine uptake at 1:30 DC:T ratio. Similar patterns of results were found for all DC:T ratios. Overall means are shown as horizontal lines and statistically significant differences between controls and patients are indicated \*  $p<0.05$ , \*\* $p<0.01$ . Altogether, these data show significantly reduced antigen uptake and allo-stimulatory capacity of blood DC from breast cancer patients compared to blood DC from healthy volunteers.
